# Supplementary material
Source: publisher figshare collection journal article supplement (https://geolsoc.figshare.com/articles/dataset/_/3453764)
Supplement: Supplementary file 1 [file 1]

| <b>Eruption date</b> | <b>CO<sub>2</sub> (ppm)</b> | <b>% error</b> | <b>H<sub>2</sub>O (wt%)</b> | <b>% error</b> | <b>F (ppm)</b> | <b>% error</b> |  |
|----------------------|-----------------------------|----------------|-----------------------------|----------------|----------------|----------------|--|
| 26 Oct. (Phase 2)    | 401564                      | 9              | 0.04                        | 2              | 38             | 15             |  |
|                      | 223649                      | 10             | 0.04                        | 10             | 39             | 15             |  |
|                      | 89744                       | 7              | 0.05                        | 4              | 22             | 12             |  |
|                      | 468010                      | 6              | 0.01                        | 4              | 5              | 18             |  |
|                      | 149536                      | 7              | 0.04                        | 10             | 6              | 14             |  |
|                      | 153262                      | 19             | 0.03                        | 4              | 18             | 12             |  |
|                      | 27364                       | 7              | 0.02                        | 6              | 11             | 21             |  |
|                      | 50476                       | 5              | 0.01                        | 7              | 51             | 11             |  |
|                      | 109985                      | 6              | 0.02                        | 5              | 95             | 12             |  |
|                      | 219381                      | 6              | 0.02                        | 5              | 4              | 19             |  |
|                      | 158317                      | 3              | 0.07                        | 11             | 3              | 12             |  |
|                      | 76824                       | 7              | 0.03                        | 4              | 3              | 21             |  |
|                      | 415840                      | 5              | 0.03                        | 3              | 6              | 15             |  |
|                      | 10064                       | 6              | 0.02                        | 4              | 7              | 15             |  |
|                      | 73012                       | 5              | 0.03                        | 7              | 26             | 20             |  |
|                      | 127587                      | 17             | 0.02                        | 3              | 10             | 14             |  |
|                      | 37930                       | 10             | 0.00                        | 9              | 19             | 10             |  |
|                      | 88783                       | 9              | 0.01                        | 8              | 200            | 20             |  |
|                      | 134276                      | 18             | 0.01                        | 6              | 18             | 19             |  |
|                      | 88705                       | 15             | 0.04                        | 8              | 284            | 12             |  |
|                      | 69589                       | 11             | 0.04                        | 4              | 18             | 6              |  |
|                      | 421074                      | 20             | 0.05                        | 10             | 13             | 9              |  |
|                      | 55917                       | 9              | 0.04                        | 3              | 9              | 10             |  |
|                      | 79643                       | 12             | 0.02                        | 5              | 5              | 9              |  |
|                      | 26365                       | 7              | 0.03                        | 3              | 15             | 19             |  |
|                      | 47733                       | 10             | 0.03                        | 5              | 75             | 2              |  |
|                      | 24773                       | 13             | 0.02                        | 5              | 103            | 3              |  |
|                      | 101858                      | 16             | 0.04                        | 3              | 15             | 18             |  |
|                      | 1294                        | 20             | 0.02                        | 6              |                |                |  |
|                      | 127026                      | 15             | 0.02                        | 4              |                |                |  |
|                      |                             |                |                             | 0.02           | 12             |                |  |
|                      |                             |                |                             | 0.01           | 5              |                |  |
|                      |                             |                | 0.01                        | 5              |                |                |  |

|                  |               |    |             |    |           |                |
|------------------|---------------|----|-------------|----|-----------|----------------|
|                  |               |    | 0.01        | 8  |           |                |
|                  |               |    | 0.01        | 9  |           |                |
|                  |               |    | 0.05        | 4  |           |                |
|                  |               |    | 0.00        | 5  |           |                |
|                  |               |    | 0.02        | 9  |           |                |
|                  | <b>135319</b> |    | <b>0.03</b> |    | <b>40</b> | <i>Average</i> |
|                  | <b>128778</b> |    | <b>0.02</b> |    | <b>64</b> | <i>1 σ</i>     |
| 5 Nov. (Phase 3) | 59678         | 11 | 0.01        | 3  | 854       | 7              |
|                  | 46114         | 10 | 0.02        | 5  | 747       | 5              |
|                  | 5936          | 9  | 0.01        | 9  | 589       | 9              |
|                  | 1347          | 8  | 0.05        | 4  | 255       | 12             |
|                  | 21251         | 6  | 0.01        | 7  | 65        | 8              |
|                  | 1637          | 20 | 0.02        | 5  | 533       | 6              |
|                  | 17380         | 17 | 0.01        | 6  | 522       | 9              |
|                  | 29164         | 14 | 0.04        | 6  | 157       | 7              |
|                  | 18701         | 8  | 0.03        | 11 | 781       | 4              |
|                  | 4915          | 18 | 0.00        | 4  | 107       | 3              |
|                  | 483           | 16 | 0.01        | 5  | 9         | 8              |
|                  | 16265         | 6  | 0.01        | 7  | 15        | 10             |
|                  | 4124          | 13 | 0.01        | 8  | 3         | 16             |
|                  | 30611         | 17 | 0.00        | 3  | 88        | 1              |
|                  | 31130         | 12 | 0.02        | 4  | 422       | 6              |
|                  | 11440         | 11 | 0.03        | 12 | 406       | 5              |
|                  | 3880          | 8  | 0.02        | 2  | 749       | 2              |
|                  |               |    | 0.03        | 3  | 849       | 3              |
|                  |               |    | 0.01        | 4  | 385       | 2              |
|                  |               |    | 0.04        | 6  | 927       | 7              |
|                  |               |    | 0.02        | 11 | 116       | 20             |
|                  |               |    | 0.01        | 4  | 42        | 4              |
|                  |               |    | 0.02        | 3  | 33        | 5              |
|                  |               |    | 0.01        | 6  | 122       | 6              |
|                  |               |    | 0.02        | 3  | 831       | 2              |
|                  |               |    | 0.02        | 3  | 779       | 2              |

|              |             |    |            |                |
|--------------|-------------|----|------------|----------------|
|              | 0.02        | 4  | 647        | 2              |
|              | 0.04        | 3  | 136        | 8              |
|              | 0.02        | 12 | 636        | 3              |
|              | 0.02        | 9  | 526        | 4              |
|              | 0.02        | 5  | 886        | 13             |
|              | 0.02        | 6  | 832        | 4              |
|              | 0.02        | 2  | 867        | 17             |
|              | 0.02        | 2  | 87         | 2              |
|              | 0.00        | 4  |            |                |
| <b>17886</b> | <b>0.02</b> |    | <b>441</b> | <i>Average</i> |
| <b>16958</b> | <b>0.01</b> |    | <b>331</b> | <i>1 σ</i>     |

Supplementary Appendix 2
