# Supplementary material
Source: publisher figshare collection journal article supplement (https://geolsoc.figshare.com/articles/dataset/_/3453764)
Supplement: Supplementary file 2 [file 1]

**Feldspar microlite composition (mol% ±2)**

| <b>Sample</b> | <i>Or</i> | <i>Ab</i> | <i>An</i> | <i>Total</i> |
|---------------|-----------|-----------|-----------|--------------|
| 527-1         |           |           |           |              |
| 5 Nov.        | 12.0      | 16.0      | 72.0      | 100.0        |
| Phase 3       | 2.5       | 38.0      | 60.0      | 100.5        |
|               | 55.0      | 39.0      | 6.0       | 100.0        |
|               | 1.9       | 41.0      | 57.0      | 99.9         |
|               | 1.6       | 34.0      | 64.0      | 99.6         |
|               | 1.3       | 31.0      | 68.0      | 100.3        |
|               | 1.1       | 31.0      | 68.0      | 100.1        |
|               | 1.7       | 34.0      | 64.0      | 99.7         |
|               | 2.0       | 41.0      | 57.0      | 100.0        |
|               | 1.2       | 35.0      | 64.0      | 100.2        |
|               | 1.3       | 34.0      | 64.5      | 99.8         |
|               | 1.5       | 36.5      | 62.0      | 100.0        |
|               | 1.4       | 34.0      | 65.0      | 100.4        |
|               | 1.3       | 35.0      | 64.0      | 100.3        |
|               | 1.5       | 33.0      | 65.0      | 99.5         |
|               | 1.4       | 34.0      | 65.0      | 100.4        |
|               | 1.5       | 33.5      | 65.0      | 100.0        |
|               | 1.9       | 34.0      | 64.0      | 99.9         |
|               | 1.9       | 38.0      | 60.0      | 99.9         |
|               | 1.5       | 34.0      | 64.0      | 99.5         |
|               | 3.7       | 51.0      | 45.0      | 99.7         |
|               | 1.4       | 34.0      | 64.0      | 99.4         |
|               | 1.6       | 35.0      | 64.0      | 100.6        |
| 527-7         | 11.7      | 59.0      | 29.0      | 99.7         |
| 26 Oct.       | 43.7      | 52.0      | 4.5       | 100.2        |
| Phase 2       | 26.6      | 62.0      | 11.2      | 99.8         |
|               | 35.0      | 57.0      | 7.6       | 99.6         |
|               | 38.0      | 54.0      | 7.3       | 99.3         |
|               | 36.0      | 57.0      | 7.3       | 100.3        |
|               | 53.0      | 45.0      | 1.8       | 99.8         |
|               | 14.9      | 67.0      | 18.0      | 99.9         |
|               | 12.6      | 61.0      | 26.0      | 99.6         |
|               | 41.0      | 54.0      | 5.3       | 100.3        |
|               | 19.5      | 65.0      | 15.6      | 100.1        |
|               | 17.0      | 63.0      | 19.8      | 99.8         |
|               | 14.0      | 60.5      | 26.0      | 100.5        |
|               | 18.0      | 65.0      | 17.0      | 100.0        |

|      |      |      |       |
|------|------|------|-------|
| 32.0 | 60.0 | 8.4  | 100.4 |
| 40.0 | 55.0 | 6.0  | 101.0 |
| 11.0 | 65.0 | 24.0 | 100.0 |
| 19.0 | 56.0 | 25.0 | 100.0 |
| 25.0 | 61.0 | 14.0 | 100.0 |
| 36.0 | 52.0 | 11.0 | 99.0  |
| 6.3  | 55.0 | 38.0 | 99.3  |
| 46.0 | 49.0 | 5.5  | 100.5 |
| 9.0  | 60.0 | 31.0 | 100.0 |
| 6.3  | 57.0 | 36.0 | 99.3  |
| 20.0 | 64.0 | 16.5 | 100.5 |
| 5.0  | 56.0 | 39.0 | 100.0 |
| 45.0 | 50.0 | 6.0  | 101.0 |
| 34.0 | 52.0 | 14.0 | 100.0 |
| 4.7  | 55.0 | 40.0 | 99.7  |
| 29.0 | 56.0 | 15.5 | 100.5 |
| 33.5 | 56.0 | 10.0 | 99.5  |
| 24.0 | 62.0 | 15.0 | 101.0 |
| 18.0 | 58.0 | 24.0 | 100.0 |
| 18.0 | 63.0 | 19.0 | 100.0 |
| 33.0 | 58.0 | 9.7  | 100.7 |
| 13.0 | 60.0 | 27.0 | 100.0 |
| 13.0 | 62.5 | 25.0 | 100.5 |
| 25.0 | 61.0 | 14.5 | 100.5 |

Supplementary Appendix 1
